# Supplementary material for: Polymer nanosphere lithography: fabrication of an ordered trigonal polymeric nanostructureElectronic supplementary information (ESI) available: detailed explanations of Fig. 2, AFM image of trigonal shape after etching and scheme of conventional nanosphere lithography. See http://www.rsc.org/suppdata/cc/b3/b300638g/
Source: Royal Society of Chemistry journal article supplement (doi:10.1039/b300638g), 2003-03-26
Supplement: b300638g.doc [file b300638g.doc]

# Electronic supplementary information

## Polymer nanosphere lithography: fabrication of an ordered trigonal polymeric nanostructure

Dong Kee Yi,and Dong-Yu Kim*

Center for Frontier Materials, Department of Materials Science and Engineering, Kwang Ju Institute of Science and Technology, 1 Oryong Puk-Ku, Kwang-Ju, 500-712, Republic of Korea. Tel: +82-062-970-2335; *E-mail: kimdy@kjist.ac.kr

## Contents

1. **Properties of the colloids used in this experiment. 2**
2. **AFM image of trigonal nanostructures after Ar+ ion etching. 3**
3. **Detailed explanations of figure 2. 4**
4. **Scheme of conventional nanosphere lithography. 5**

Gel Permeation Chromatography analysis revealed that soluble parts of polymer had Mn =

118,000, and the PDI value was 1.39. Compared with homo PS, the colloids showed an aliphatic

C=C stretch peak at 1637 cm-1 because it contains divinylbenzene (DVB) as the cross-linker:

monoreacted or nonreacted free DVBcould be the origin of the C=C peak. The Tg of the

colloids was determined to be 123 oC from a second scan of differential scanning calorimetry.

**1. Properties of the colloids used in this experiment.**


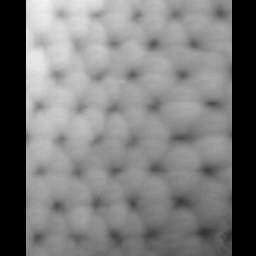

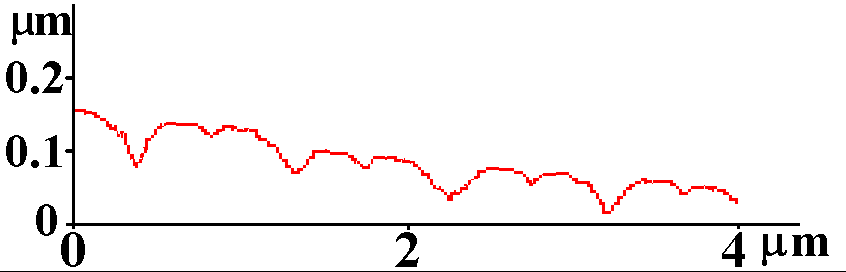

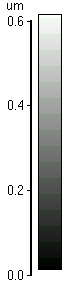

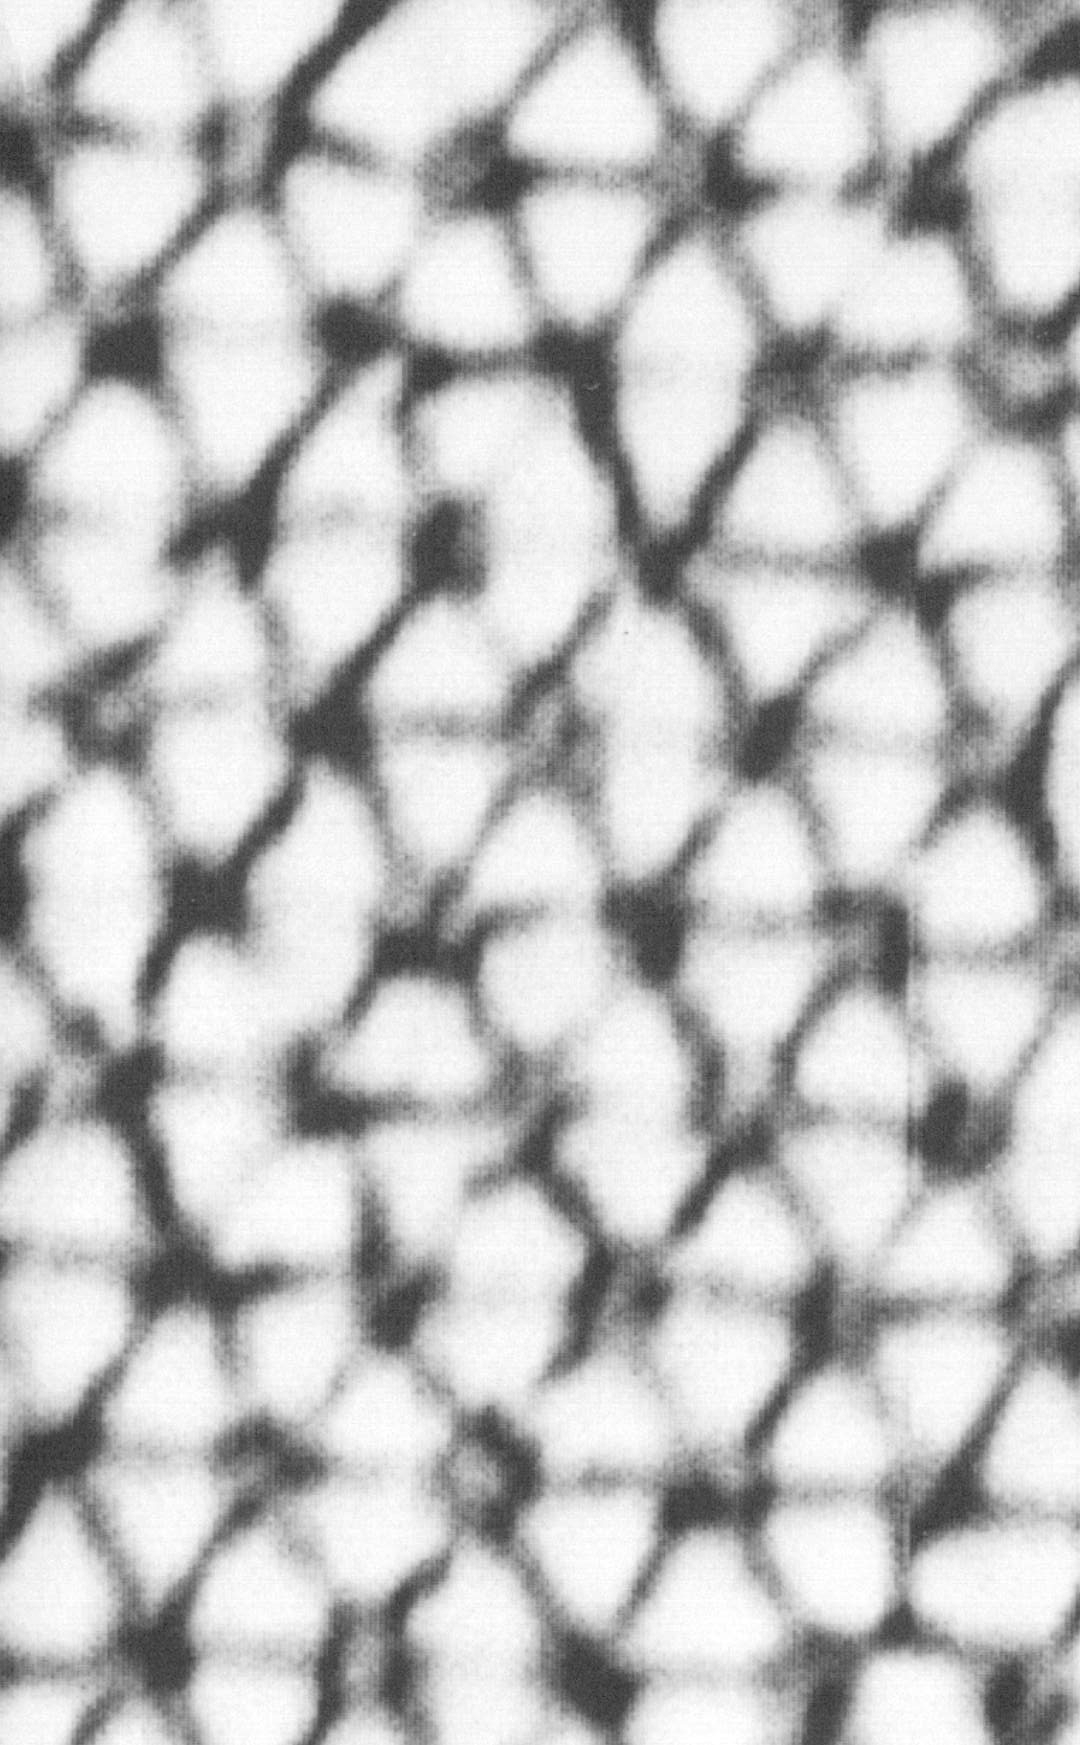


**Corresponding SEM image**

**2. AFM image of trigonal nanostructures after Ar+ ion etching.**


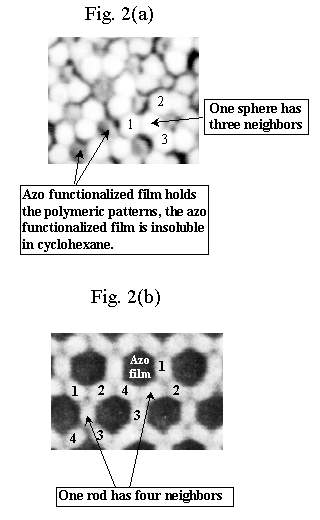


**Wide view of Fig. 2(b).**

**
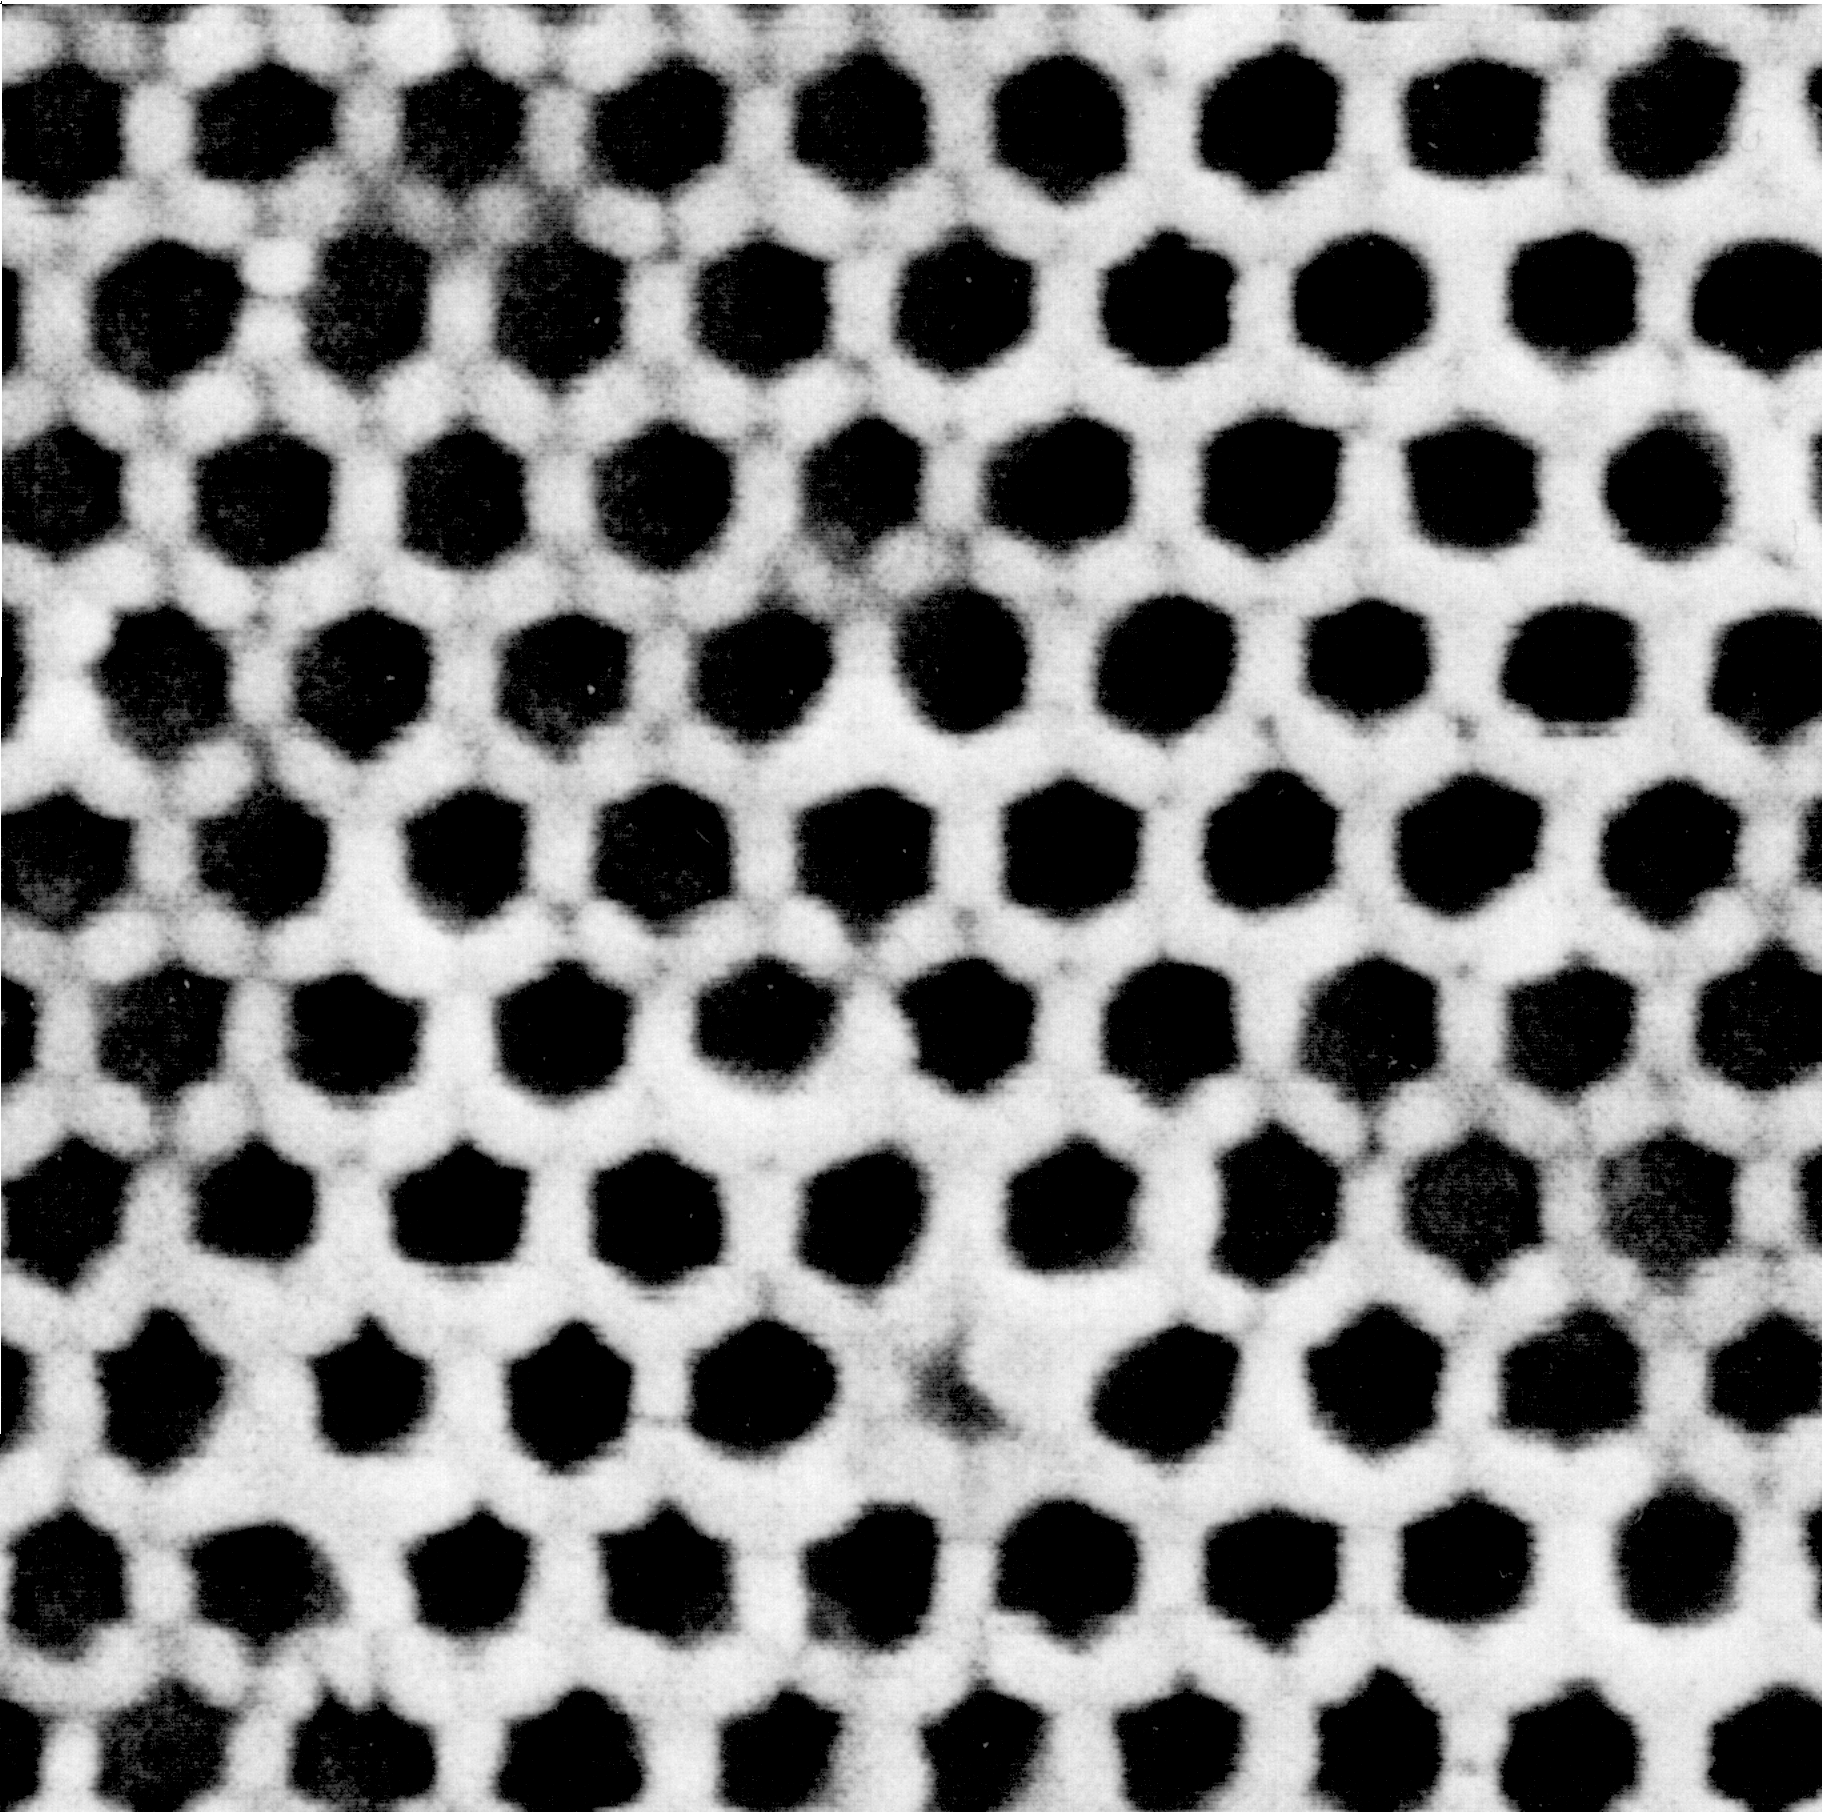
 3. Detailed explanations of figure 2.**

**
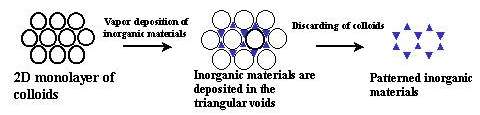
**

**4. Scheme of conventional nanosphere lithography.**
